# Supplementary material for: Spontaneous Depolarization-Induced Action Potentials of ON-Starburst Amacrine Cells during Cholinergic and Glutamatergic Retinal Waves
Source: PubMed Central journal article supplement (PMC7759856; doi:10.3390/cells9122574), 2020-12-01
Supplement: cells-09-02574-s001.pdf [file cells-09-02574-s001.pdf]

# Spontaneous depolarization-induced action potentials of ON-starburst amacrine cells during cholinergic and glutamatergic retinal waves

Rong-Shan Yan<sup>1,2</sup>, Xiong-Li Yang<sup>1,3</sup>, Yong-Mei Zhong<sup>1,3\*</sup> and Dao-Qi Zhang<sup>2\*</sup>

<sup>1</sup>Institutes of Brain Science, Fudan University, Shanghai, China

<sup>2</sup>Eye Research Institute, Oakland University, Rochester, MI

<sup>3</sup>State Key Laboratory of Medical Neurobiology and MOE Frontiers Center for Brain Science, Fudan University, Shanghai, China

\* Correspondence: ymzhong@fudan.edu.cn (Y-M.Z.); zhang@oakland.edu (D-Q.Z.)

## Supplementary Figures

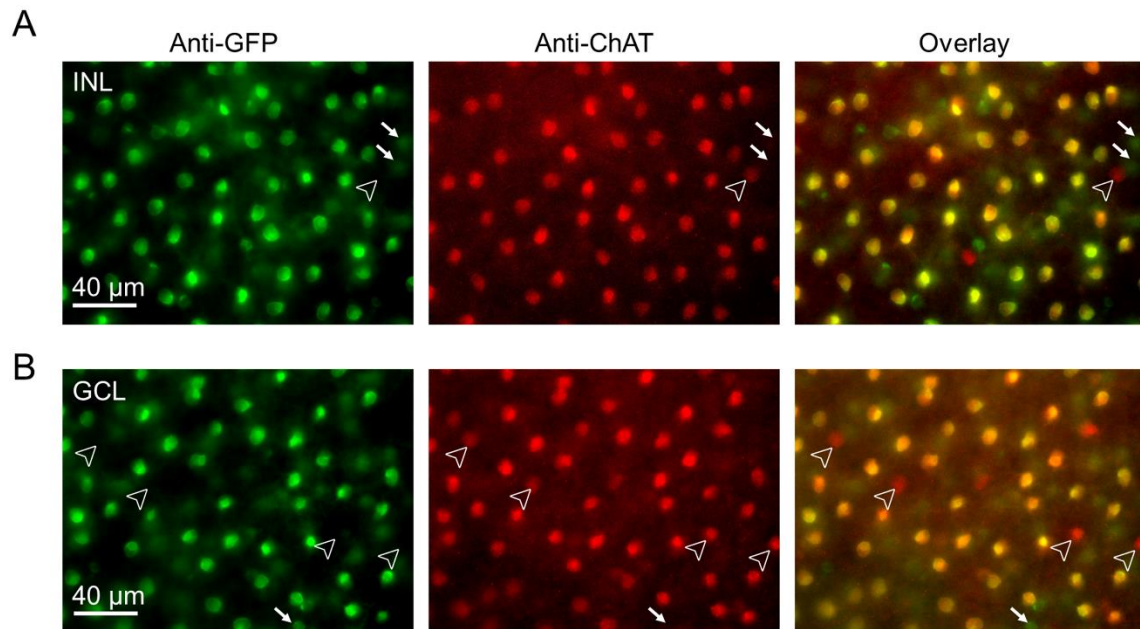

**Supplementary Figure 1. Starburst amacrine cells are genetically labeled in ChAT-Cre/GCaMP6f mice.** Retinas were isolated from the eyes of ChAT-Cre/GCaMP6f mice at P5. They were then fixed and treated with antibodies against GFP and ChAT. Images were taken from the INL (**A**) and GCL (**B**), respectively. GCaMP6f signal was revealed by a GFP antibody (green, left panels in **A** and **B**), whereas SACs were labeled by a ChAT antibody (red, middle panels in **A** and **B**). Overlay images show that almost all GFP<sup>+</sup> cells were ChAT<sup>+</sup> SACs (yellow, right panels in **A** and **B**). We occasionally observed that GFP<sup>+</sup> cells were ChAT<sup>-</sup> (arrows in **A** and **B**) and GFP<sup>-</sup> cells were ChAT<sup>+</sup> (arrowheads in **A** and **B**). The data suggest that ChAT-Cre/GCaMP6f mice can be used to real-time monitor Ca<sup>2+</sup> waves of SACs in a living retina.

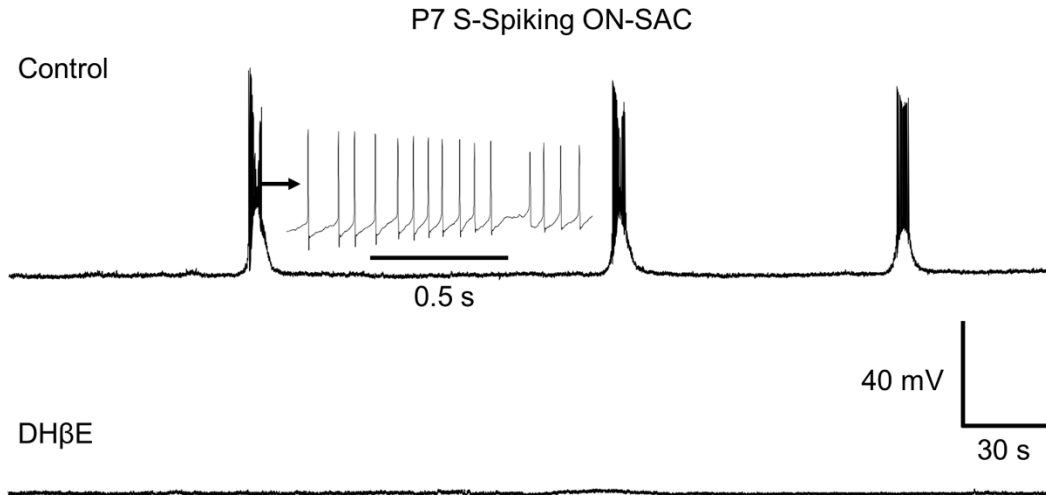

**Supplementary Figure 2. ACh receptors mediate spontaneous depolarization of ON-SACs during the first postnatal week.** Whole-cell current-clamp recordings were performed on ON-SACs from flat-mount retinas of ChAT-Cre/tdTomato mice at P7. An ON-SAC exhibited spontaneous rhythmic depolarization, and each of depolarization was accompanied by a burst of APs (top trace). An insert highlights the burst of APs on an extended time scale. The spontaneous depolarization and APs were completely blocked by 3  $\mu$ M Dh $\beta$ E, an ACh receptor antagonist (bottom trace).

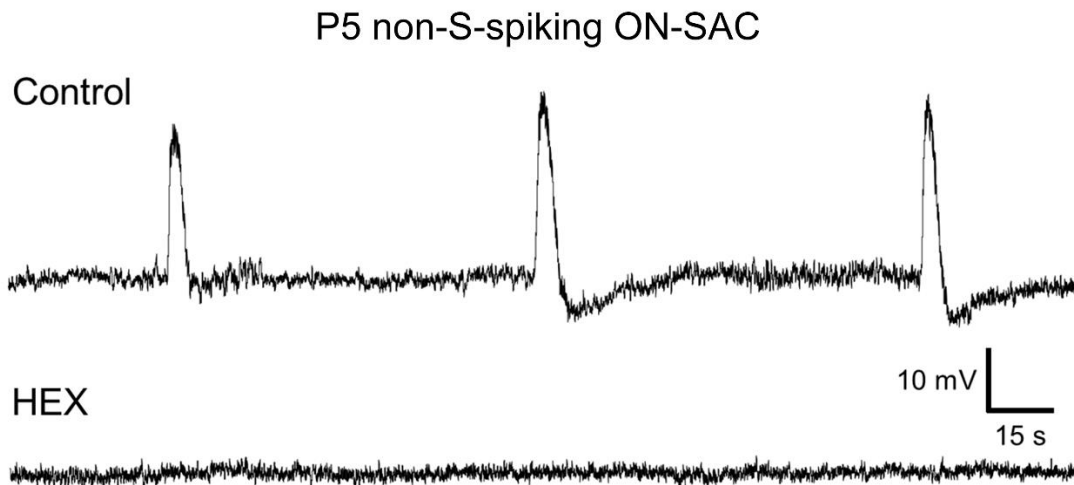

**Supplementary Figure 3. ACh receptors mediate spontaneous depolarization of non-S-spiking ON-SACs during the first postnatal week.** Whole-cell current-clamp recordings were performed on non-S-spiking ON-SAC from flat-mount retinas of ChAT-Cre/tdTomato mice at P5. A non-S-spiking ON-SAC exhibited spontaneous rhythmic depolarization (top trace). The spontaneous depolarization was completely blocked by 100  $\mu$ M HEX, an ACh receptor antagonist (bottom trace).

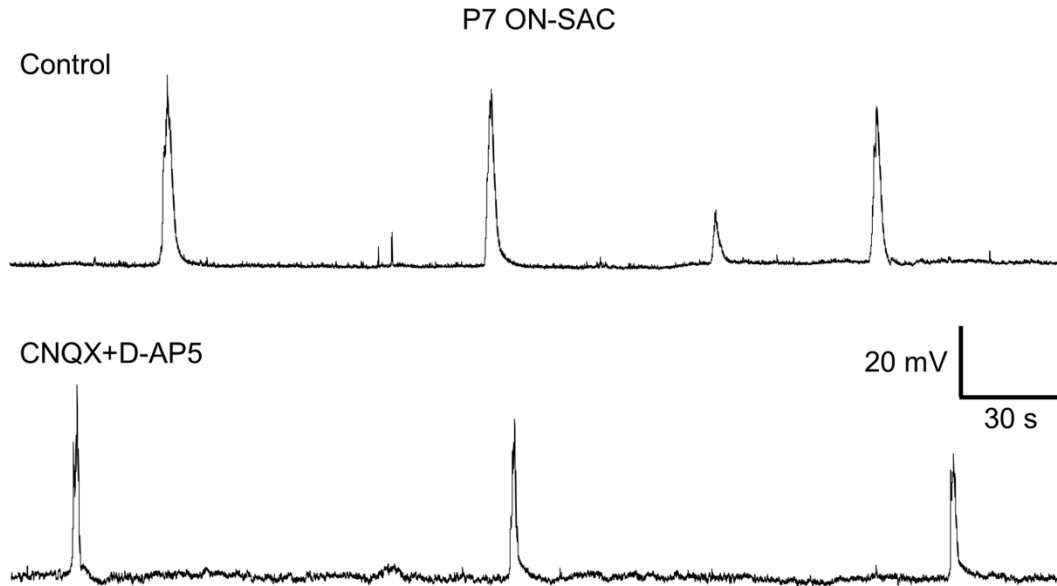

**Supplementary Figure 4. Glutamate receptors are not involved in mediating spontaneous depolarization of ON-SACs during the first postnatal week.** Whole-cell current-clamp recordings were performed on ON-SACs from flat-mount retinas of ChAT-Cre/tdTomato mice at P7. An ON-SAC exhibited spontaneous rhythmic depolarization (top trace). The spontaneous depolarization (bottom trace) remained unchanged in the presence of a mixture of NMDA receptor antagonist D-AP5 (50  $\mu$ M) and AMPA receptor antagonist CNQX (50  $\mu$ M).

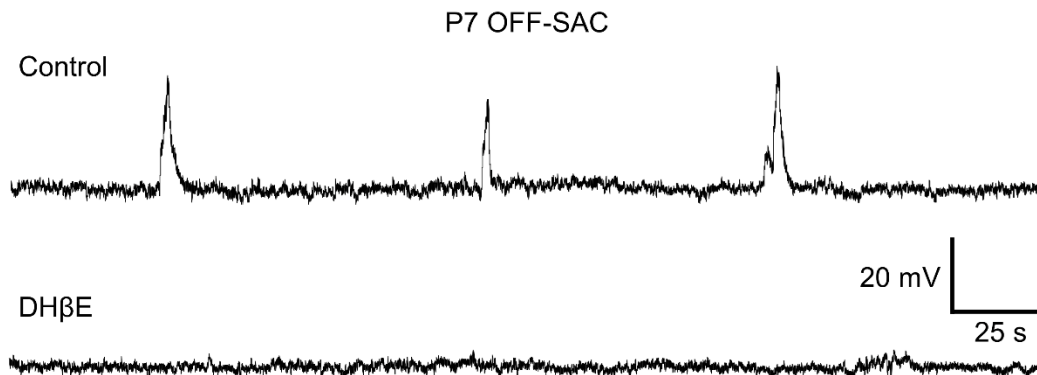

**Supplementary Figure 5. ACh receptors mediate spontaneous depolarization of OFF-SACs during the first postnatal week.** Whole-cell current-clamp recordings were performed on OFF-SACs from flat-mount retinas of ChAT-Cre/tdTomato mice at P7. An OFF-SAC exhibited spontaneous rhythmic depolarization (top trace). The spontaneous depolarization was completely blocked by 3  $\mu$ M Dh $\beta$ E.

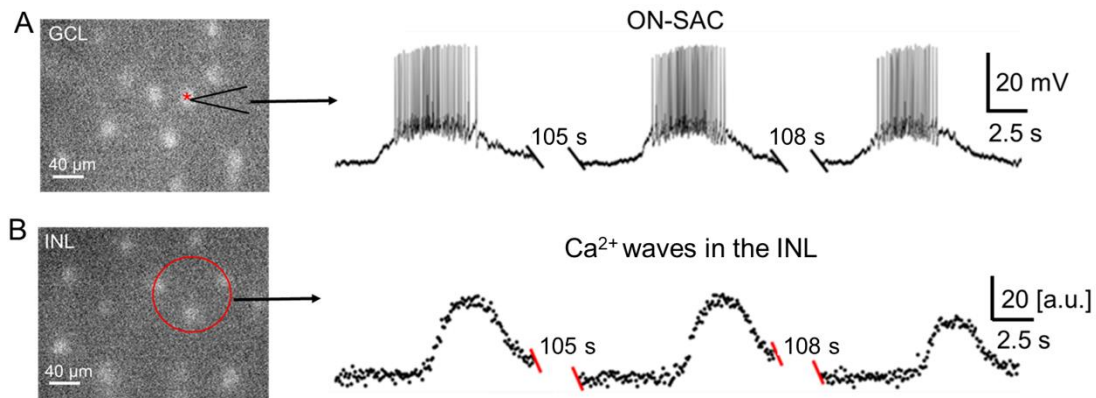

**Supplementary Figure 6. Intensities of Ca<sup>2+</sup> waves in the INL are correlated with the number of APs per wave in ON-SACs.** Ca<sup>2+</sup> imaging in the INL was simultaneously performed with whole-cell current-clamp recordings of ON-SACs in the GCL in retinas of ChAT-Cre/Ai95D mice at P5. **(A)** A live image (left panel) shows Ai95-labeled ON-SACs at P5. An arrow points to the glass pipette that was used to patch an ON-SAC. The cell exhibited spontaneous rhythmic depolarizations accompanied by APs (right panel). **(B)** Ca<sup>2+</sup> images in the INL were taken simultaneously with the ON-SAC recording. A circular ROI (red, 2996.2 μm<sup>2</sup>) of the INL located vertically above patched ON-SACs in **(A)** was used to construct a Ca<sup>2+</sup> wave trace (left panel). Each Ca<sup>2+</sup> wave was preceded by an electrical wave of the ON-SAC. The recording trace between each wave in **B** (right panel) was not shown (double slashes) for a period of time (indicated above the double-slashes).
